# Supplementary material for: E2F4 Promotes Neuronal Regeneration and Functional Recovery after Spinal Cord Injury in Zebrafish
Source: Front Pharmacol. 2016 May 9;7:119. doi: 10.3389/fphar.2016.00119 (PMC4860404; doi:10.3389/fphar.2016.00119)
Supplement: Table S6 — Gene ontologies enriched in DEGs potentially regulated by TFs. S6-1 Gene ontologies enriched in DEGs specific for zebrafish SCI at 1 dpi potentially regulated by at least two of e2f4, tfdp1, and foxm1; S6-2, Gene ontologies enriched in DEGs specific for zebrafish SCI at 3 dpi potentially regulated by at least two of e2f4, tfdp1, and foxm1; S6-3, Gene ontologies enriched in DEGs specific for mouse/rat SCI at 1 dpi potentially regulated by Nfic and Tead4; S6-4, Gene ontologies enriched in DEGs specific for mouse/rat SCI at 3 dpi potentially regulated by Nfic and Tead4. [file Table6.XLSX]

## Sheet: Z 1dpi
Table S6-1 Gene ontologies enriched in DEGs specific for zebrafish SCI at 1 dpi potentially regulated by at least two of e2f4, tfdp1 and foxm1
Annotation Cluster 1	Enrichment Score: 10.9
Category	Term	PValue	Genes
GOTERM_BP_FAT	cell cycle	2.62807e-14	KIF23, KIFC1, XRCC2, NEK2, GMNN, CCNF, SGOL1, TTK, CDKN3, RACGAP1, RAD54L, SMC2, SMC4, UHRF1, CCNB2, PLK1, INCENP, KPNA2, CCNA2, MYC
GOTERM_BP_FAT	cell cycle process	3.59625e-14	KIF23, KIFC1, XRCC2, NEK2, CCNF, SGOL1, TTK, CDKN3, RACGAP1, RAD54L, SMC2, SMC4, CCNB2, PLK1, INCENP, KPNA2, CCNA2, MYC
GOTERM_BP_FAT	M phase	1.0989e-13	KIF23, KIFC1, XRCC2, NEK2, CCNF, SGOL1, TTK, RAD54L, SMC2, SMC4, CCNB2, PLK1, INCENP, KPNA2, CCNA2
GOTERM_BP_FAT	cell cycle phase	1.22364e-13	KIF23, KIFC1, XRCC2, NEK2, CCNF, SGOL1, TTK, CDKN3, RAD54L, SMC2, SMC4, CCNB2, PLK1, INCENP, KPNA2, CCNA2
SP_PIR_KEYWORDS	cell cycle	2.22885e-13	KIF23, KIFC1, UHRF1, CCNB2, PLK1, NEK2, INCENP, GMNN, SGOL1, CCNF, RACGAP1, CDKN3, CCNA2, SMC2, SMC4
SP_PIR_KEYWORDS	mitosis	3.14161e-12	KIF23, KIFC1, CCNB2, NEK2, PLK1, INCENP, SGOL1, CCNF, CCNA2, SMC2, SMC4
SP_PIR_KEYWORDS	cell division	4.29872e-12	KIF23, KIFC1, CCNB2, NEK2, PLK1, INCENP, SGOL1, CCNF, RACGAP1, CCNA2, SMC2, SMC4
GOTERM_BP_FAT	mitotic cell cycle	1.13412e-11	KIF23, KIFC1, NEK2, CCNF, SGOL1, TTK, CDKN3, SMC2, SMC4, CCNB2, PLK1, INCENP, KPNA2, CCNA2
GOTERM_BP_FAT	cell division	3.13941e-10	KIF23, KIFC1, CCNB2, NEK2, PLK1, INCENP, SGOL1, CCNF, RACGAP1, CCNA2, SMC2, SMC4
GOTERM_BP_FAT	nuclear division	3.34951e-10	KIF23, KIFC1, CCNB2, NEK2, PLK1, INCENP, SGOL1, CCNF, CCNA2, SMC2, SMC4
GOTERM_BP_FAT	mitosis	3.34951e-10	KIF23, KIFC1, CCNB2, NEK2, PLK1, INCENP, SGOL1, CCNF, CCNA2, SMC2, SMC4
GOTERM_BP_FAT	M phase of mitotic cell cycle	3.99538e-10	KIF23, KIFC1, CCNB2, NEK2, PLK1, INCENP, SGOL1, CCNF, CCNA2, SMC2, SMC4
GOTERM_BP_FAT	organelle fission	4.95739e-10	KIF23, KIFC1, CCNB2, NEK2, PLK1, INCENP, SGOL1, CCNF, CCNA2, SMC2, SMC4
GOTERM_BP_FAT	chromosome segregation	2.92008e-06	KIFC1, NEK2, INCENP, SGOL1, SMC2, SMC4
Annotation Cluster 2	Enrichment Score: 5.54
Category	Term	PValue	Genes
UP_SEQ_FEATURE	ATP	3.72749e-07	KIF23, KIFC1, KIF4A, NEK2, TTK, OXSR1, MCM4, SMC2, RAD54L, TK1, SMC4, PLK1, MELK
GOTERM_MF_FAT	ATP binding	4.89128e-07	KIF23, KIFC1, KIF4A, XRCC2, NEK2, TTK, OXSR1, RAD54L, MCM4, SMC2, TK1, SMC4, PLK1, PAICS, MELK
GOTERM_MF_FAT	adenyl ribonucleotide binding	5.77894e-07	KIF23, KIFC1, KIF4A, XRCC2, NEK2, TTK, OXSR1, RAD54L, MCM4, SMC2, TK1, SMC4, PLK1, PAICS, MELK
GOTERM_MF_FAT	adenyl nucleotide binding	1.09835e-06	KIF23, KIFC1, KIF4A, XRCC2, NEK2, TTK, OXSR1, RAD54L, MCM4, SMC2, TK1, SMC4, PLK1, PAICS, MELK
GOTERM_MF_FAT	purine nucleoside binding	1.32194e-06	KIF23, KIFC1, KIF4A, XRCC2, NEK2, TTK, OXSR1, RAD54L, MCM4, SMC2, TK1, SMC4, PLK1, PAICS, MELK
GOTERM_MF_FAT	nucleoside binding	1.43756e-06	KIF23, KIFC1, KIF4A, XRCC2, NEK2, TTK, OXSR1, RAD54L, MCM4, SMC2, TK1, SMC4, PLK1, PAICS, MELK
SP_PIR_KEYWORDS	atp-binding	1.55359e-06	KIF23, KIFC1, KIF4A, NEK2, TTK, OXSR1, RAD54L, MCM4, SMC2, TK1, SMC4, PLK1, PAICS, MELK
GOTERM_MF_FAT	purine ribonucleotide binding	6.93504e-06	KIF23, KIFC1, KIF4A, XRCC2, NEK2, TTK, OXSR1, RAD54L, MCM4, SMC2, TK1, SMC4, PLK1, PAICS, MELK
GOTERM_MF_FAT	ribonucleotide binding	6.93504e-06	KIF23, KIFC1, KIF4A, XRCC2, NEK2, TTK, OXSR1, RAD54L, MCM4, SMC2, TK1, SMC4, PLK1, PAICS, MELK
GOTERM_MF_FAT	purine nucleotide binding	1.16588e-05	KIF23, KIFC1, KIF4A, XRCC2, NEK2, TTK, OXSR1, RAD54L, MCM4, SMC2, TK1, SMC4, PLK1, PAICS, MELK
SP_PIR_KEYWORDS	nucleotide-binding	2.16641e-05	KIF23, KIFC1, KIF4A, NEK2, TTK, OXSR1, RAD54L, MCM4, SMC2, TK1, SMC4, PLK1, PAICS, MELK
GOTERM_MF_FAT	nucleotide binding	7.25901e-05	KIF23, KIFC1, KIF4A, XRCC2, NEK2, TTK, OXSR1, RAD54L, MCM4, SMC2, TK1, SMC4, PLK1, PAICS, MELK
Annotation Cluster 3	Enrichment Score: 3.80
Category	Term	PValue	Genes
SP_PIR_KEYWORDS	kinetochore	1.9312e-07	CENPN, NEK2, PLK1, INCENP, SGOL1, CENPK
GOTERM_CC_FAT	condensed chromosome	5.62879e-07	CENPN, NEK2, INCENP, SGOL1, CENPK, SMC2, SMC4
SP_PIR_KEYWORDS	centromere	1.12434e-06	CENPN, NEK2, INCENP, SGOL1, CENPK
GOTERM_BP_FAT	chromosome segregation	2.92008e-06	KIFC1, NEK2, INCENP, SGOL1, SMC2, SMC4
GOTERM_CC_FAT	chromosome	0.000719406	CENPN, NEK2, INCENP, SGOL1, CENPK, SMC2, SMC4
SP_PIR_KEYWORDS	Chromosome partition	0.00188732	NEK2, INCENP, SGOL1
GOTERM_CC_FAT	chromosomal part	0.00217554	CENPN, INCENP, SGOL1, CENPK, SMC2, SMC4
GOTERM_CC_FAT	chromosome, centromeric region	0.00328514	CENPN, INCENP, SGOL1, CENPK
GOTERM_CC_FAT	condensed nuclear chromosome	0.00623618	NEK2, INCENP, SGOL1
GOTERM_CC_FAT	nuclear chromosome	0.0069244	NEK2, INCENP, SGOL1, SMC2
GOTERM_CC_FAT	condensed chromosome, centromeric region	0.0110878	CENPN, SGOL1, CENPK
Annotation Cluster 4	Enrichment Score: 3.79
Category	Term	PValue	Genes
GOTERM_BP_FAT	M phase of meiotic cell cycle	0.000158234	XRCC2, NEK2, PLK1, SGOL1, RAD54L
GOTERM_BP_FAT	meiosis	0.000158234	XRCC2, NEK2, PLK1, SGOL1, RAD54L
GOTERM_BP_FAT	meiotic cell cycle	0.000171078	XRCC2, NEK2, PLK1, SGOL1, RAD54L
Annotation Cluster 5	Enrichment Score: 3.64
Category	Term	PValue	Genes
GOTERM_BP_FAT	chromosome segregation	2.92008e-06	KIFC1, NEK2, INCENP, SGOL1, SMC2, SMC4
GOTERM_BP_FAT	mitotic sister chromatid segregation	0.000136953	KIFC1, NEK2, SMC2, SMC4
GOTERM_BP_FAT	sister chromatid segregation	0.000148748	KIFC1, NEK2, SMC2, SMC4
GOTERM_BP_FAT	chromosome organization	0.0460937	KIFC1, NEK2, RAD54L, SMC2, SMC4
Annotation Cluster 6	Enrichment Score: 3.43
Category	Term	PValue	Genes
GOTERM_CC_FAT	spindle	1.59408e-09	KIF23, KIFC1, KIF4A, NEK2, PLK1, INCENP, TTK, RACGAP1, MYC
GOTERM_CC_FAT	microtubule cytoskeleton	4.02335e-06	KIF23, KIFC1, KIF4A, CCNB2, NEK2, PLK1, INCENP, TTK, RACGAP1, MYC
GOTERM_CC_FAT	non-membrane-bounded organelle	2.26898e-05	KIF23, CENPN, KIFC1, KIF4A, NEK2, SGOL1, TTK, CENPK, RACGAP1, MCM4, SMC2, SMC4, CCNB2, ATF3, PLK1, INCENP, MUS81, MYC
GOTERM_CC_FAT	intracellular non-membrane-bounded organelle	2.26898e-05	KIF23, CENPN, KIFC1, KIF4A, NEK2, SGOL1, TTK, CENPK, RACGAP1, MCM4, SMC2, SMC4, CCNB2, ATF3, PLK1, INCENP, MUS81, MYC
GOTERM_BP_FAT	microtubule-based process	0.000666552	KIF23, KIFC1, KIF4A, NEK2, TTK, KPNA2
SP_PIR_KEYWORDS	microtubule	0.00131943	KIF23, KIFC1, KIF4A, INCENP, RACGAP1
GOTERM_CC_FAT	cytoskeletal part	0.00154734	KIF23, KIFC1, KIF4A, NEK2, PLK1, INCENP, TTK, RACGAP1, MYC
GOTERM_CC_FAT	microtubule	0.00412048	KIF23, KIFC1, KIF4A, INCENP, RACGAP1
GOTERM_CC_FAT	cytoskeleton	0.00434021	KIF23, KIFC1, KIF4A, CCNB2, NEK2, PLK1, INCENP, TTK, RACGAP1, MYC
SP_PIR_KEYWORDS	cytoskeleton	0.00983792	KIF23, KIFC1, KIF4A, INCENP, SGOL1, RACGAP1
GOTERM_BP_FAT	microtubule cytoskeleton organization	0.0639366	KIF23, NEK2, TTK
GOTERM_BP_FAT	cytoskeleton organization	0.12282	KIF23, NEK2, TTK, RACGAP1
Annotation Cluster 7	Enrichment Score: 2.61
Category	Term	PValue	Genes
INTERPRO	Cyclin, C-terminal	0.000406489	CCNB2, CCNF, CCNA2
INTERPRO	Cyclin, N-terminal	0.00229845	CCNB2, CCNF, CCNA2
INTERPRO	Cyclin-related	0.00288349	CCNB2, CCNF, CCNA2
INTERPRO	Cyclin	0.00336336	CCNB2, CCNF, CCNA2
SP_PIR_KEYWORDS	cyclin	0.00484959	CCNB2, CCNF, CCNA2
SMART	CYCLIN	0.00491335	CCNB2, CCNF, CCNA2
Annotation Cluster 8	Enrichment Score: 2.27
Category	Term	PValue	Genes
GOTERM_BP_FAT	DNA metabolic process	8.25236e-06	UHRF1, XRCC2, DTL, GINS3, MUS81, KPNA2, RAD54L, MCM4, MYC, TK1
SP_PIR_KEYWORDS	DNA damage	0.000847906	UHRF1, XRCC2, DTL, MUS81, RAD54L
KEGG_PATHWAY	Homologous recombination	0.00255442	XRCC2, MUS81, RAD54L
GOTERM_BP_FAT	response to DNA damage stimulus	0.00368374	UHRF1, XRCC2, DTL, MUS81, RAD54L, CCNA2
SP_PIR_KEYWORDS	dna repair	0.00727008	UHRF1, XRCC2, MUS81, RAD54L
GOTERM_BP_FAT	cellular response to stress	0.020208	UHRF1, XRCC2, DTL, MUS81, RAD54L, CCNA2
GOTERM_BP_FAT	DNA recombination	0.0349941	XRCC2, MUS81, RAD54L
GOTERM_BP_FAT	DNA repair	0.0450216	UHRF1, XRCC2, MUS81, RAD54L
GOTERM_MF_FAT	DNA binding	0.226258	UHRF1, KIF4A, XRCC2, ATF3, MUS81, RAD54L, MCM4, MYC
Annotation Cluster 9	Enrichment Score: 2.19
Category	Term	PValue	Genes
GOTERM_BP_FAT	microtubule-based process	0.000666552	KIF23, KIFC1, KIF4A, NEK2, TTK, KPNA2
SP_PIR_KEYWORDS	microtubule	0.00131943	KIF23, KIFC1, KIF4A, INCENP, RACGAP1
UP_SEQ_FEATURE	Kinesin-motor	0.00365274	KIF23, KIFC1, KIF4A
INTERPRO	Kinesin, motor region, conserved site	0.00370258	KIF23, KIFC1, KIF4A
INTERPRO	Kinesin, motor region	0.00370258	KIF23, KIFC1, KIF4A
GOTERM_CC_FAT	microtubule	0.00412048	KIF23, KIFC1, KIF4A, INCENP, RACGAP1
SMART	KISc	0.00540615	KIF23, KIFC1, KIF4A
SP_PIR_KEYWORDS	cytoskeleton	0.00983792	KIF23, KIFC1, KIF4A, INCENP, SGOL1, RACGAP1
GOTERM_MF_FAT	microtubule motor activity	0.0118778	KIF23, KIFC1, KIF4A
SP_PIR_KEYWORDS	motor protein	0.0307597	KIF23, KIFC1, KIF4A
GOTERM_MF_FAT	motor activity	0.0372976	KIF23, KIFC1, KIF4A
GOTERM_BP_FAT	microtubule-based movement	0.0399957	KIF23, KIFC1, KIF4A
Annotation Cluster 10	Enrichment Score: 2.15
Category	Term	PValue	Genes
GOTERM_CC_FAT	nuclear lumen	0.00160932	KIF23, KIF4A, ATF3, NEK2, PLK1, GMNN, MUS81, KPNA2, MCM4, CCNA2, MYC
GOTERM_CC_FAT	intracellular organelle lumen	0.00729262	KIF23, KIF4A, ATF3, NEK2, PLK1, GMNN, MUS81, KPNA2, MCM4, CCNA2, MYC
GOTERM_CC_FAT	organelle lumen	0.00856239	KIF23, KIF4A, ATF3, NEK2, PLK1, GMNN, MUS81, KPNA2, MCM4, CCNA2, MYC
GOTERM_CC_FAT	membrane-enclosed lumen	0.00981574	KIF23, KIF4A, ATF3, NEK2, PLK1, GMNN, MUS81, KPNA2, MCM4, CCNA2, MYC
GOTERM_CC_FAT	nucleoplasm	0.0176519	KIF23, PLK1, GMNN, KPNA2, MCM4, CCNA2, MYC
Annotation Cluster 11	Enrichment Score: 2.05
Category	Term	PValue	Genes
SP_PIR_KEYWORDS	ATP	0.00142754	KIF23, KIFC1, NEK2, PLK1, TK1
SP_PIR_KEYWORDS	nucleotide binding	0.020841	KIF23, KIFC1, TK1
SP_PIR_KEYWORDS	P-loop	0.0242274	KIF23, KIFC1, TK1

## Sheet: Z 3dpi
Table S6-2 Gene ontologies enriched in DEGs specific for zebrafish SCI at 3 dpi potentially regulated by at least two of e2f4, tfdp1 and foxm1
Annotation Cluster 1	Enrichment Score: 5.26
Category	Term	PValue	Genes
GOTERM_CC_FAT	intracellular organelle lumen	2.06655e-06	KIF23, NEK2, USP1, SNRPD3, PDIA4, MCM4, CCNB1, RFC5, HSP90B1, GTF2A1, PLK1, POLD1, PCNA, MUS81, HSPD1, CCNA2, MYC
GOTERM_CC_FAT	organelle lumen	2.81062e-06	KIF23, NEK2, USP1, SNRPD3, PDIA4, MCM4, CCNB1, RFC5, HSP90B1, GTF2A1, PLK1, POLD1, PCNA, MUS81, HSPD1, CCNA2, MYC
GOTERM_CC_FAT	membrane-enclosed lumen	3.65653e-06	KIF23, NEK2, USP1, SNRPD3, PDIA4, MCM4, CCNB1, RFC5, HSP90B1, GTF2A1, PLK1, POLD1, PCNA, MUS81, HSPD1, CCNA2, MYC
GOTERM_CC_FAT	nucleoplasm	7.49948e-06	RFC5, KIF23, CCNB1, GTF2A1, PLK1, USP1, POLD1, SNRPD3, PCNA, MCM4, CCNA2, MYC
GOTERM_CC_FAT	nuclear lumen	3.1361e-05	KIF23, NEK2, USP1, SNRPD3, MCM4, CCNB1, RFC5, GTF2A1, PLK1, POLD1, PCNA, MUS81, MYC, CCNA2
Annotation Cluster 2	Enrichment Score: 4.77
Category	Term	PValue	Genes
GOTERM_BP_FAT	DNA metabolic process	3.63435e-09	RFC5, TYMS, XRCC3, DTL, USP1, POLD1, GINS3, MUS81, PCNA, HSPD1, MYC, MCM4, TK1
GOTERM_BP_FAT	response to DNA damage stimulus	4.7687e-06	RFC5, TYMS, XRCC3, DTL, USP1, POLD1, MUS81, PCNA, CCNA2
GOTERM_BP_FAT	DNA repair	9.30882e-05	RFC5, TYMS, XRCC3, USP1, POLD1, MUS81, PCNA
GOTERM_BP_FAT	cellular response to stress	9.5738e-05	RFC5, TYMS, XRCC3, DTL, USP1, POLD1, MUS81, PCNA, CCNA2
SP_PIR_KEYWORDS	DNA damage	0.00882049	XRCC3, DTL, USP1, MUS81
Annotation Cluster 3	Enrichment Score: 4.18
Category	Term	PValue	Genes
GOTERM_BP_FAT	DNA metabolic process	3.63435e-09	RFC5, TYMS, XRCC3, DTL, USP1, POLD1, GINS3, MUS81, PCNA, HSPD1, MYC, MCM4, TK1
GOTERM_BP_FAT	DNA replication	5.70888e-07	RFC5, TYMS, DTL, POLD1, GINS3, PCNA, MCM4, TK1
SP_PIR_KEYWORDS	dna replication	1.03628e-06	RFC5, DTL, POLD1, GINS3, PCNA, MCM4
GOTERM_BP_FAT	DNA repair	9.30882e-05	RFC5, TYMS, XRCC3, USP1, POLD1, MUS81, PCNA
KEGG_PATHWAY	DNA replication	0.000342092	RFC5, POLD1, PCNA, MCM4
GOTERM_BP_FAT	nucleotide-excision repair, DNA gap filling	0.000913188	RFC5, POLD1, PCNA
KEGG_PATHWAY	Mismatch repair	0.00353902	RFC5, POLD1, PCNA
GOTERM_BP_FAT	nucleotide-excision repair	0.00935867	RFC5, POLD1, PCNA
KEGG_PATHWAY	Nucleotide excision repair	0.0125951	RFC5, POLD1, PCNA
Annotation Cluster 4	Enrichment Score: 4.00
Category	Term	PValue	Genes
SP_PIR_KEYWORDS	mitosis	8.99469e-08	KIF23, CCNB1, KIFC1, CCNB2, NEK2, PLK1, CCNA2, MIS12
GOTERM_BP_FAT	cell cycle phase	9.75592e-07	KIF23, CCNB1, KIFC1, CCNB2, NEK2, PLK1, POLD1, CCNA2, LFNG, MIS12
SP_PIR_KEYWORDS	cell division	1.07287e-06	KIF23, CCNB1, KIFC1, CCNB2, NEK2, PLK1, CCNA2, MIS12
GOTERM_BP_FAT	cell cycle process	1.41882e-06	KIF23, CCNB1, KIFC1, CCNB2, NEK2, PLK1, POLD1, CCNA2, LFNG, MYC, MIS12
GOTERM_BP_FAT	nuclear division	1.52855e-06	KIF23, CCNB1, KIFC1, CCNB2, NEK2, PLK1, CCNA2, MIS12
GOTERM_BP_FAT	mitosis	1.52855e-06	KIF23, CCNB1, KIFC1, CCNB2, NEK2, PLK1, CCNA2, MIS12
GOTERM_BP_FAT	M phase of mitotic cell cycle	1.72395e-06	KIF23, CCNB1, KIFC1, CCNB2, NEK2, PLK1, CCNA2, MIS12
GOTERM_BP_FAT	M phase	1.87756e-06	KIF23, CCNB1, KIFC1, CCNB2, NEK2, PLK1, CCNA2, LFNG, MIS12
GOTERM_BP_FAT	organelle fission	1.99726e-06	KIF23, CCNB1, KIFC1, CCNB2, NEK2, PLK1, CCNA2, MIS12
GOTERM_BP_FAT	mitotic cell cycle	4.49275e-06	KIF23, CCNB1, KIFC1, CCNB2, NEK2, PLK1, POLD1, CCNA2, MIS12
GOTERM_BP_FAT	cell division	1.05947e-05	KIF23, CCNB1, KIFC1, CCNB2, NEK2, PLK1, CCNA2, MIS12
GOTERM_BP_FAT	cell cycle	2.36363e-05	KIF23, CCNB1, KIFC1, CCNB2, NEK2, PLK1, POLD1, CCNA2, LFNG, MYC, MIS12
SP_PIR_KEYWORDS	cell cycle	4.07996e-05	KIF23, CCNB1, KIFC1, CCNB2, NEK2, PLK1, CCNA2, MIS12
SP_PIR_KEYWORDS	ATP	0.000123528	KIF23, KIFC1, NEK2, PLK1, HSPD1, TK1
GOTERM_CC_FAT	spindle	0.000530137	KIF23, KIFC1, NEK2, PLK1, MYC
GOTERM_CC_FAT	microtubule cytoskeleton	0.00251246	KIF23, CCNB1, KIFC1, CCNB2, NEK2, PLK1, MYC
KEGG_PATHWAY	Progesterone-mediated oocyte maturation	0.00432506	CCNB1, CCNB2, PLK1, CCNA2
GOTERM_CC_FAT	centrosome	0.0196823	CCNB1, KIFC1, NEK2, PLK1
GOTERM_CC_FAT	microtubule organizing center	0.0270087	CCNB1, KIFC1, NEK2, PLK1
GOTERM_CC_FAT	cytoskeleton	0.0589954	KIF23, CCNB1, ALDOA, KIFC1, CCNB2, NEK2, PLK1, MYC
GOTERM_CC_FAT	cytoskeletal part	0.0950876	KIF23, CCNB1, KIFC1, NEK2, PLK1, MYC
GOTERM_BP_FAT	microtubule-based process	0.145331	KIF23, KIFC1, NEK2
SP_PIR_KEYWORDS	cytoskeleton	0.383167	KIF23, CCNB1, KIFC1
Annotation Cluster 5	Enrichment Score: 3.22
Category	Term	PValue	Genes
GOTERM_CC_FAT	nuclear lumen	3.1361e-05	KIF23, NEK2, USP1, SNRPD3, MCM4, CCNB1, RFC5, GTF2A1, PLK1, POLD1, PCNA, MUS81, MYC, CCNA2
GOTERM_CC_FAT	intracellular non-membrane-bounded organelle	0.000268121	ALDOA, KIF23, CENPN, KIFC1, NEK2, SNRPD3, CENPK, MCM4, MIS12, CCNB1, RFC5, CCNB2, GTF2A1, PLK1, PCNA, MUS81, MYC
GOTERM_CC_FAT	non-membrane-bounded organelle	0.000268121	ALDOA, KIF23, CENPN, KIFC1, NEK2, SNRPD3, CENPK, MCM4, MIS12, CCNB1, RFC5, CCNB2, GTF2A1, PLK1, PCNA, MUS81, MYC
GOTERM_CC_FAT	cytoskeleton	0.0589954	KIF23, CCNB1, ALDOA, KIFC1, CCNB2, NEK2, PLK1, MYC
Annotation Cluster 6	Enrichment Score: 2.93
Category	Term	PValue	Genes
KEGG_PATHWAY	Cell cycle	2.72531e-07	CCNB1, CCNB2, PLK1, YWHAQ, PCNA, MCM4, CCNA2, MYC
KEGG_PATHWAY	Progesterone-mediated oocyte maturation	0.00432506	CCNB1, CCNB2, PLK1, CCNA2
KEGG_PATHWAY	Oocyte meiosis	0.00858821	CCNB1, CCNB2, PLK1, YWHAQ
GOTERM_BP_FAT	positive regulation of macromolecule metabolic process	0.191586	CCNB1, PLK1, CENPK, CCNA2, MYC
Annotation Cluster 7	Enrichment Score: 2.87
Category	Term	PValue	Genes
PIR_SUPERFAMILY	cyclin, A/B/D/E types	0.000270214	CCNB1, CCNB2, CCNA2
INTERPRO	Cyclin, A/B/D/E	0.000295619	CCNB1, CCNB2, CCNA2
PIR_SUPERFAMILY	Cyclin_A_B_D_E	0.000323819	CCNB1, CCNB2, CCNA2
INTERPRO	Cyclin, C-terminal	0.000406489	CCNB1, CCNB2, CCNA2
INTERPRO	Cyclin, N-terminal	0.00229845	CCNB1, CCNB2, CCNA2
INTERPRO	Cyclin-related	0.00288349	CCNB1, CCNB2, CCNA2
INTERPRO	Cyclin	0.00336336	CCNB1, CCNB2, CCNA2
SMART	CYCLIN	0.00376973	CCNB1, CCNB2, CCNA2
KEGG_PATHWAY	Progesterone-mediated oocyte maturation	0.00432506	CCNB1, CCNB2, PLK1, CCNA2
SP_PIR_KEYWORDS	cyclin	0.00484959	CCNB1, CCNB2, CCNA2
Annotation Cluster 8	Enrichment Score: 2.86
Category	Term	PValue	Genes
SP_PIR_KEYWORDS	ATP	0.000123528	KIF23, KIFC1, NEK2, PLK1, HSPD1, TK1
SP_PIR_KEYWORDS	atp-binding	0.00029435	RFC5, KIF23, KIFC1, XRCC3, HSP90B1, NEK2, PLK1, HSPD1, MCM4, MELK, TK1
UP_SEQ_FEATURE	nucleotide phosphate-binding region:ATP	0.000730346	RFC5, KIF23, KIFC1, XRCC3, NEK2, PLK1, MCM4, MELK, TK1
GOTERM_MF_FAT	ATP binding	0.000918735	RFC5, KIF23, KIFC1, XRCC3, HSP90B1, NEK2, PLK1, HSPD1, MCM4, MELK, TK1
GOTERM_MF_FAT	adenyl ribonucleotide binding	0.00102131	RFC5, KIF23, KIFC1, XRCC3, HSP90B1, NEK2, PLK1, HSPD1, MCM4, MELK, TK1
GOTERM_MF_FAT	adenyl nucleotide binding	0.0015321	RFC5, KIF23, KIFC1, XRCC3, HSP90B1, NEK2, PLK1, HSPD1, MCM4, MELK, TK1
GOTERM_MF_FAT	purine nucleoside binding	0.00172122	RFC5, KIF23, KIFC1, XRCC3, HSP90B1, NEK2, PLK1, HSPD1, MCM4, MELK, TK1
GOTERM_MF_FAT	nucleoside binding	0.00181412	RFC5, KIF23, KIFC1, XRCC3, HSP90B1, NEK2, PLK1, HSPD1, MCM4, MELK, TK1
SP_PIR_KEYWORDS	nucleotide-binding	0.00191348	RFC5, KIF23, KIFC1, XRCC3, HSP90B1, NEK2, PLK1, HSPD1, MCM4, MELK, TK1
GOTERM_MF_FAT	nucleotide binding	0.0019693	KIF23, RFC5, TYMS, KIFC1, HSP90B1, XRCC3, PLK1, NEK2, POLD1, HSPD1, MCM4, MELK, TK1
GOTERM_MF_FAT	purine ribonucleotide binding	0.00480785	RFC5, KIF23, KIFC1, XRCC3, HSP90B1, NEK2, PLK1, HSPD1, MCM4, MELK, TK1
GOTERM_MF_FAT	ribonucleotide binding	0.00480785	RFC5, KIF23, KIFC1, XRCC3, HSP90B1, NEK2, PLK1, HSPD1, MCM4, MELK, TK1
GOTERM_MF_FAT	purine nucleotide binding	0.00659586	RFC5, KIF23, KIFC1, XRCC3, HSP90B1, NEK2, PLK1, HSPD1, MCM4, MELK, TK1
Annotation Cluster 9	Enrichment Score: 2.40
Category	Term	PValue	Genes
SP_PIR_KEYWORDS	ATP	0.000123528	KIF23, KIFC1, NEK2, PLK1, HSPD1, TK1
SP_PIR_KEYWORDS	nucleotide binding	0.020841	KIF23, KIFC1, TK1
SP_PIR_KEYWORDS	P-loop	0.0242274	KIF23, KIFC1, TK1
Annotation Cluster 10	Enrichment Score: 2.34
Category	Term	PValue	Genes
SP_PIR_KEYWORDS	kinetochore	8.73975e-06	CENPN, NEK2, PLK1, CENPK, MIS12
SP_PIR_KEYWORDS	centromere	0.0028272	CENPN, NEK2, CENPK
GOTERM_CC_FAT	condensed chromosome	0.0043924	CENPN, NEK2, CENPK, MIS12
GOTERM_CC_FAT	chromosome	0.00609541	RFC5, CENPN, NEK2, PCNA, CENPK, MIS12
GOTERM_CC_FAT	condensed chromosome kinetochore	0.00976271	CENPN, CENPK, MIS12
GOTERM_CC_FAT	condensed chromosome, centromeric region	0.0125069	CENPN, CENPK, MIS12
GOTERM_CC_FAT	kinetochore	0.0167628	CENPN, CENPK, MIS12
GOTERM_CC_FAT	chromosomal part	0.0167804	RFC5, CENPN, PCNA, CENPK, MIS12
GOTERM_CC_FAT	chromosome, centromeric region	0.0405338	CENPN, CENPK, MIS12

## Sheet: MR 1dpi
Table S6-3 Gene ontologies enriched in DEGs specific for mouse/rat SCI at 1 dpi potentially regulated by Nfic and Tead4
Annotation Cluster 1	Enrichment Score: 3.49
Category	Term	PValue	Genes
GOTERM_BP_FAT	cell death	4.06702e-05	IER3, TNFRSF12A, LGALS1, TGM2, ITGB2, DAP, PPP2R2B, GADD45A, NEK6
GOTERM_BP_FAT	death	4.27371e-05	IER3, TNFRSF12A, LGALS1, TGM2, ITGB2, DAP, PPP2R2B, GADD45A, NEK6
GOTERM_BP_FAT	programmed cell death	0.000114887	IER3, TNFRSF12A, LGALS1, TGM2, ITGB2, DAP, GADD45A, NEK6
GOTERM_BP_FAT	apoptosis	0.000812871	IER3, TNFRSF12A, LGALS1, ITGB2, DAP, GADD45A, NEK6
SP_PIR_KEYWORDS	Apoptosis	0.0210752	TNFRSF12A, DAP, PPP2R2B, NEK6
Annotation Cluster 2	Enrichment Score: 2.65
Category	Term	PValue	Genes
GOTERM_CC_FAT	focal adhesion	2.06092e-05	CAV1, CD44, TRIM25, ZYX, PXN
GOTERM_CC_FAT	cell-substrate adherens junction	2.39893e-05	CAV1, CD44, TRIM25, ZYX, PXN
GOTERM_CC_FAT	cell-substrate junction	2.9801e-05	CAV1, CD44, TRIM25, ZYX, PXN
GOTERM_CC_FAT	adherens junction	0.000106004	CAV1, CD44, TRIM25, ZYX, PXN
GOTERM_CC_FAT	anchoring junction	0.000158456	CAV1, CD44, TRIM25, ZYX, PXN
GOTERM_CC_FAT	basolateral plasma membrane	0.000299043	CAV1, CD44, TRIM25, ZYX, PXN
GOTERM_CC_FAT	cell junction	0.00921193	CAV1, CD44, TRIM25, ZYX, PXN
SP_PIR_KEYWORDS	host-virus interaction	0.00972328	CAV1, VIM, TRIM25, ZYX
BIOCARTA	h_integrinPathway:Integrin Signaling Pathway	0.0176336	CAV1, ZYX, PXN
KEGG_PATHWAY	Focal adhesion	0.116567	CAV1, ZYX, PXN
GOTERM_CC_FAT	integral to plasma membrane	0.124777	CAV1, CD44, AXL, ITGB2, ZYX
GOTERM_CC_FAT	intrinsic to plasma membrane	0.13262	CAV1, CD44, AXL, ITGB2, ZYX
GOTERM_CC_FAT	plasma membrane part	0.139204	CAV1, CD44, AXL, TRIM25, ITGB2, ZYX, PXN

## Sheet: MR 3dpi
Table S6-4 Gene ontologies enriched in DEGs specific for mouse/rat SCI at 3 dpi potentially regulated by Nfic and Tead4
Annotation Cluster 1	Enrichment Score: 2.33
Category	Term	PValue	Genes
GOTERM_BP_FAT	programmed cell death	0.00205833	IER3, TNFRSF12A, TGM2, ITGB2, GADD45A, NEK6
GOTERM_BP_FAT	cell death	0.00417604	IER3, TNFRSF12A, TGM2, ITGB2, GADD45A, NEK6
GOTERM_BP_FAT	death	0.00430193	IER3, TNFRSF12A, TGM2, ITGB2, GADD45A, NEK6
GOTERM_BP_FAT	apoptosis	0.0126994	IER3, TNFRSF12A, ITGB2, GADD45A, NEK6
